# Supplementary material for: Self-organization of amide dendrons with focal dipeptide units
Source: Royal Society of Chemistry journal article supplement (doi:10.1039/c1sm06008b), 2011-01-01
Supplement: c1sm06008b.pdf [file c1sm06008b.pdf]

## Electronic Supplementary Information

# Self-Organization of Amide Dendrons with Focal Dipeptide Units

*Jeonghun Lee,<sup>a</sup> Joung Min Kim,<sup>b</sup> Mikiyoung Yun,<sup>a</sup> Chiyoung Park,<sup>a</sup> Junwon Park,<sup>b</sup> Keun Hyeung Lee,<sup>\*,b</sup>  
Chulhee Kim<sup>\*,a</sup>*

<sup>a</sup>Department of Polymer Science and Engineering, Inha University, Incheon 402-751, Korea

<sup>b</sup>Department of Chemistry, Inha University, Incheon 402-751, Korea

**\*To whom correspondence should be addressed, E-mail: [leekh@inha.ac.kr](mailto:leekh@inha.ac.kr), [chk@inha.ac.kr](mailto:chk@inha.ac.kr)**

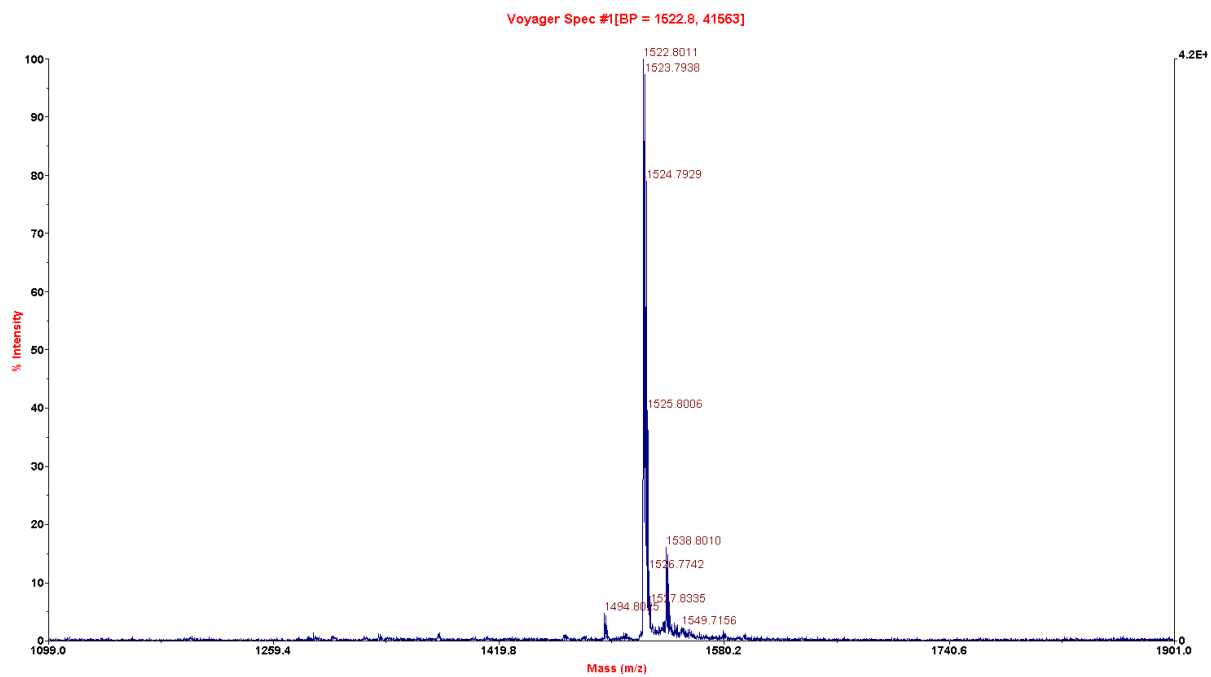

**Figure S1.** MALDI-TOF mass spectrum of **2G-GlyGly**.  $[M+Na]^+$  calcd 1522.17, obsd 1522.80

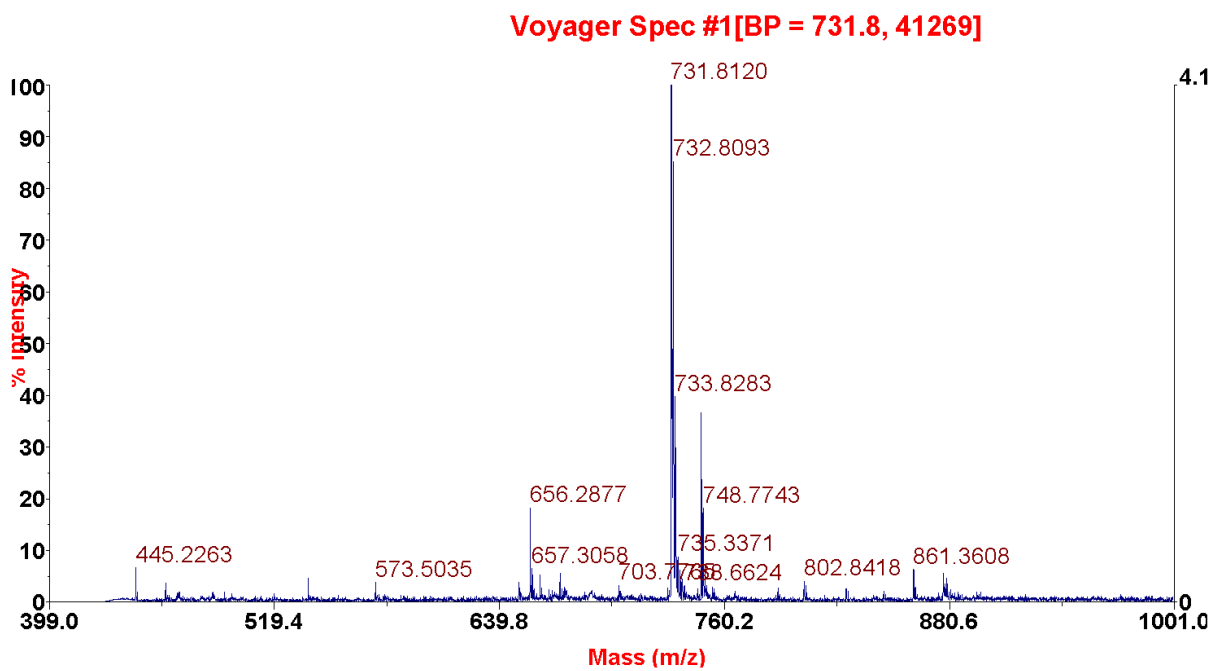

**Figure S2.** MALDI-TOF mass spectrum of **1G-GlyGly**.  $[M+Na]^+$  calcd 731.54, obsd 731.81

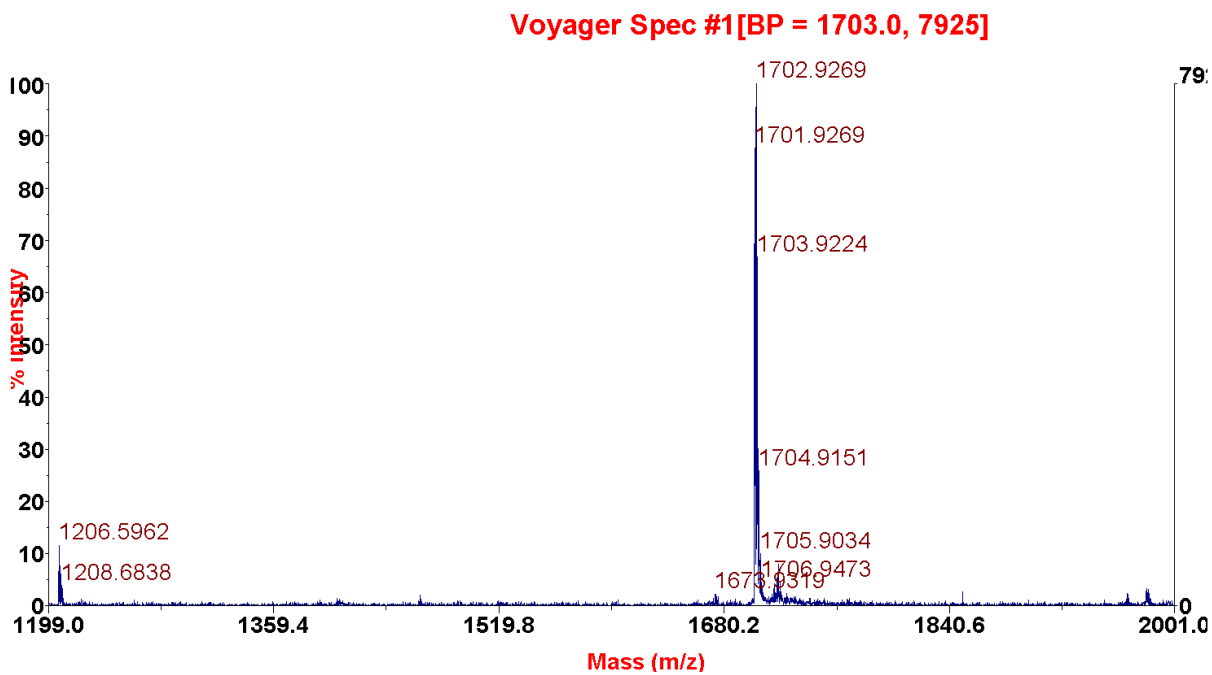

**Figure S3.** MALDI-TOF mass spectrum of **2G-PhePhe**.  $[M+Na]^+$  calcd 1703.27, obsd 1701.92

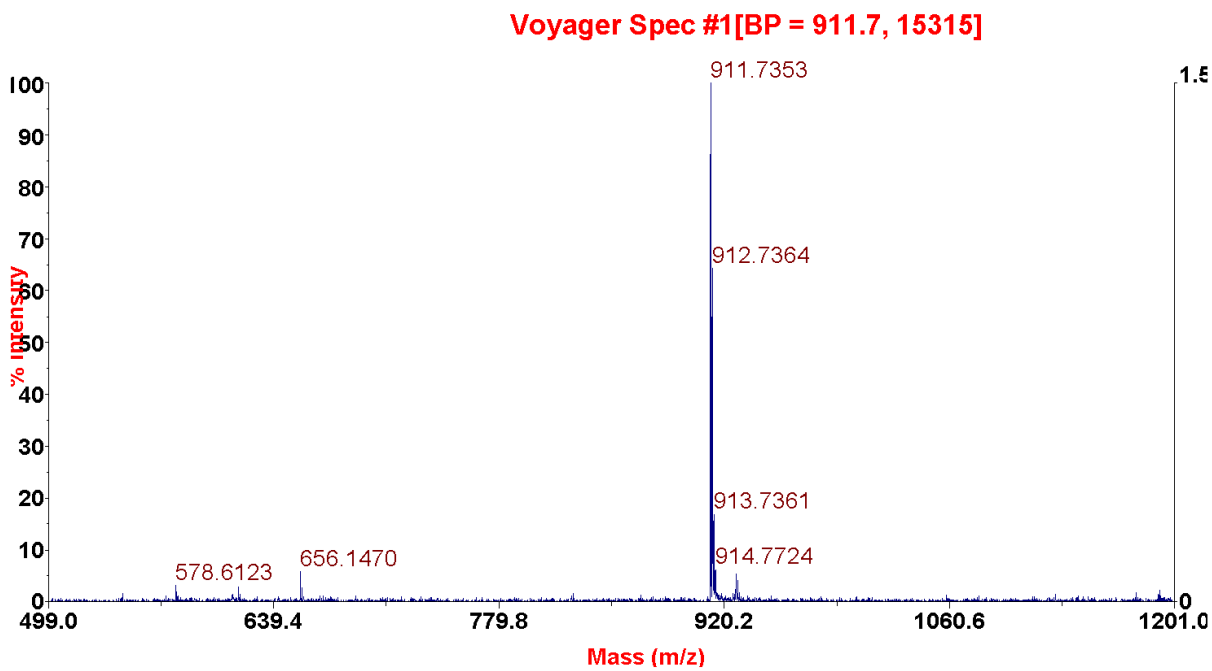

**Figure S4.** MALDI-TOF mass spectrum of **1G-PhePhe**.  $[M+Na]^+$  calcd 911.64, obsd 911.73

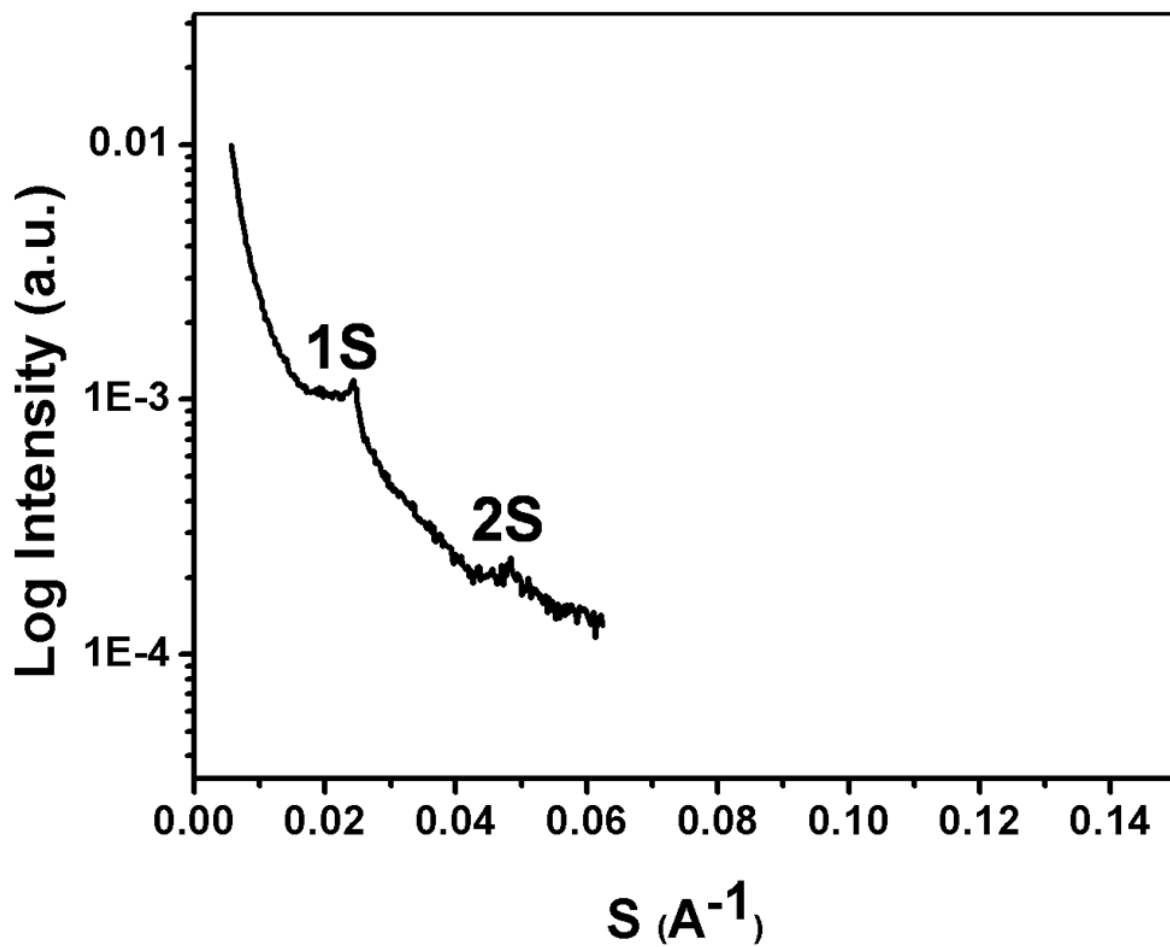

**Figure S5.** SAXS spectrum of **2G-PhePhe** in HFIP/water ( $s=0.0242$ ,  $41.3\text{\AA}$ ), where  $s(\text{\AA}^{-1}) = (\lambda/2\sin\theta)$ .
